# Supplementary material for: Antiviral CD8+ T-cell immune responses are impaired by cigarette smoke and in COPD
Source: PubMed Central journal article supplement — Eur Respir J. 2023 Aug 3;62(2):2201374. doi: 10.1183/13993003.01374-2022 (PMC10397470; doi:10.1183/13993003.01374-2022), 2023-08-03
Supplement: ERJ-01374-2022.Figures.pdf [file ERJ-01374-2022.Figures.pdf]

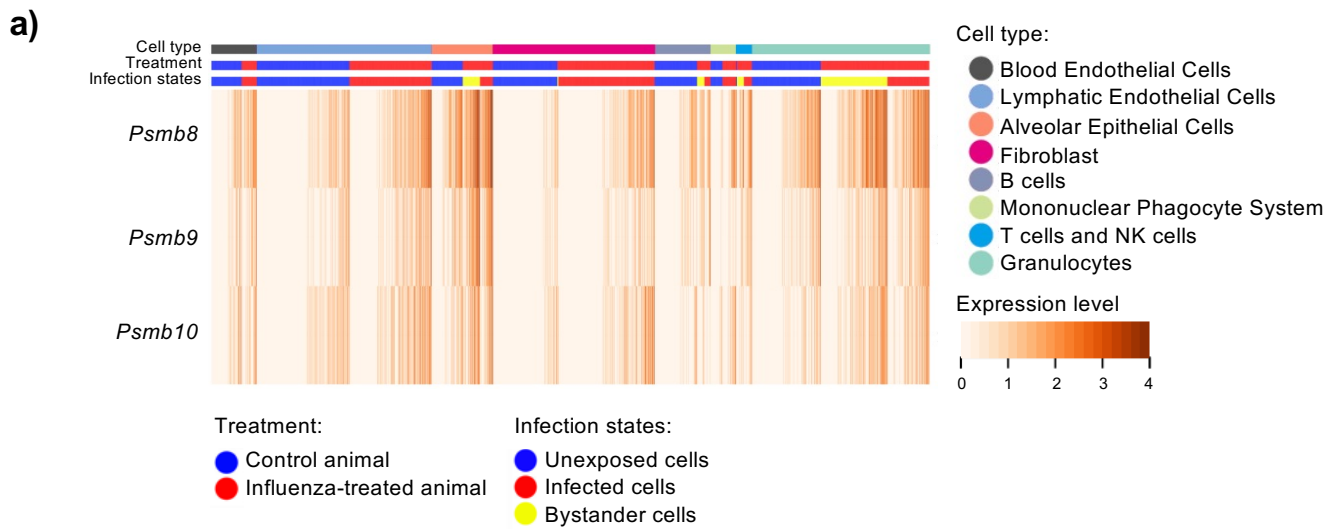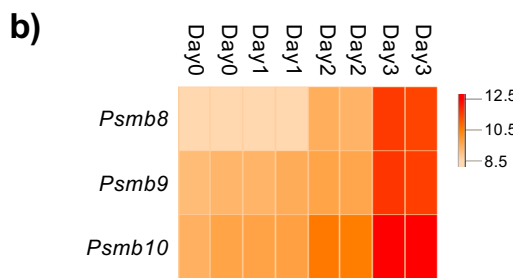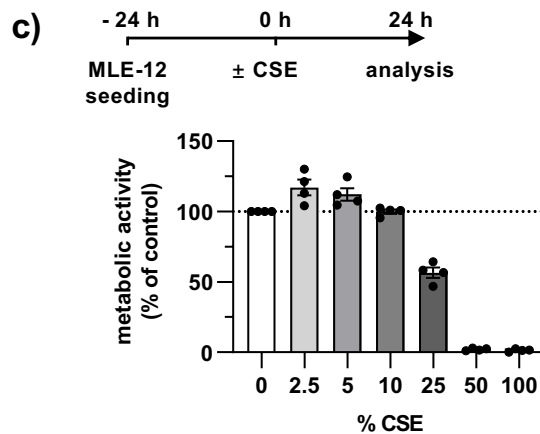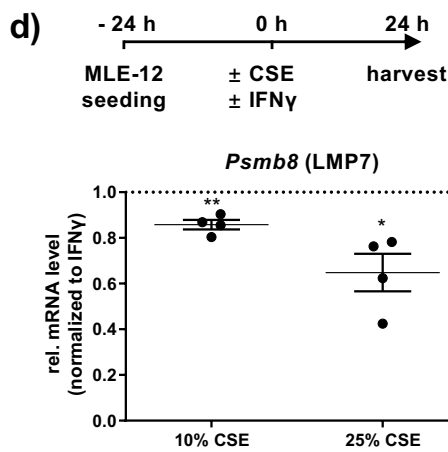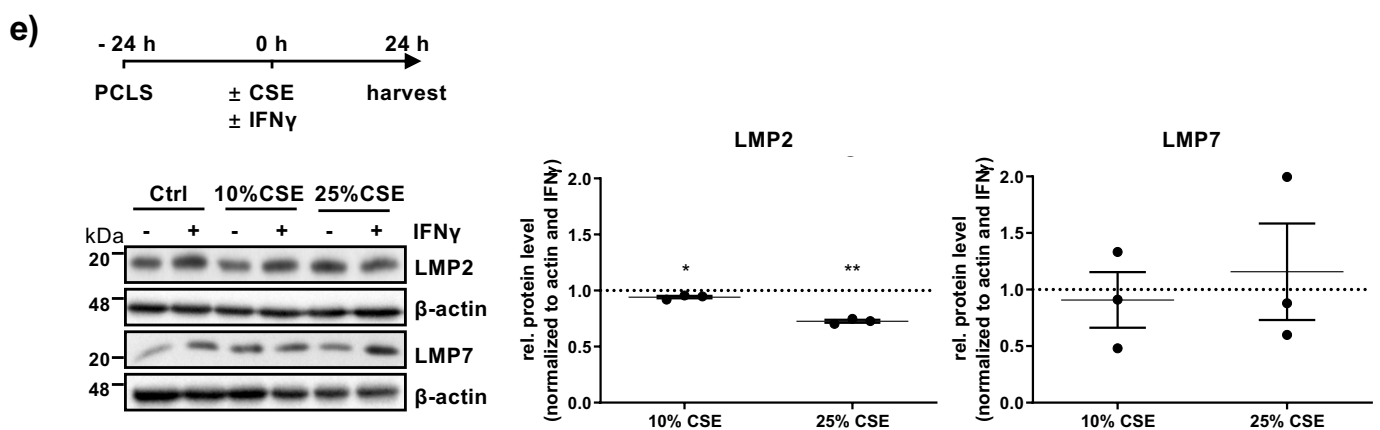

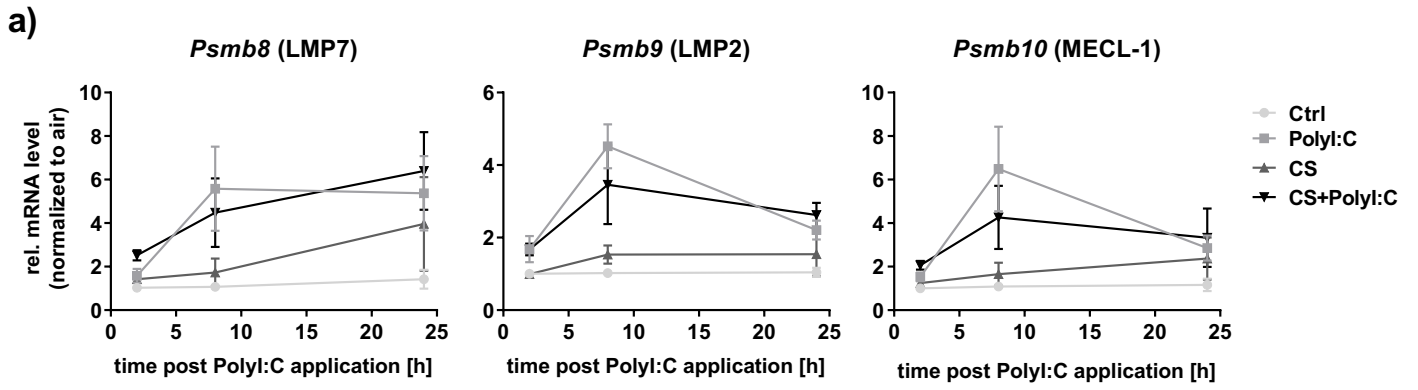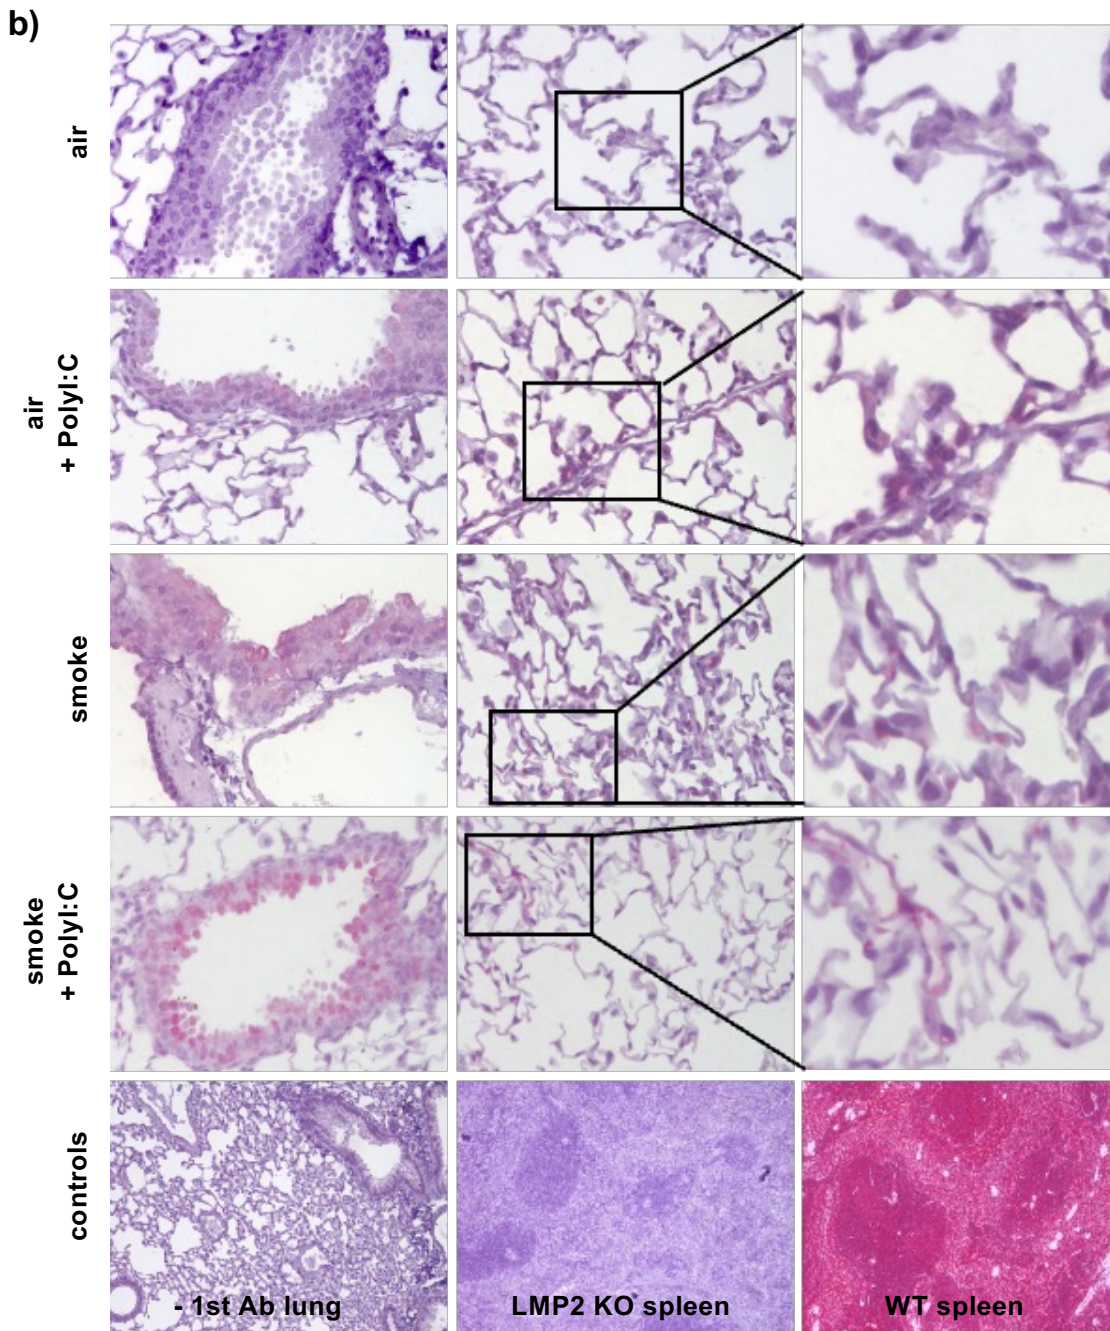

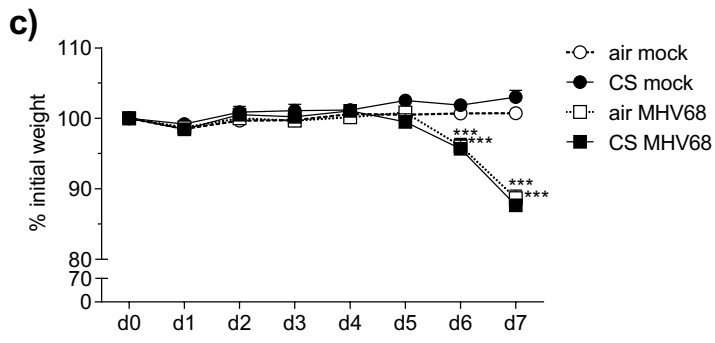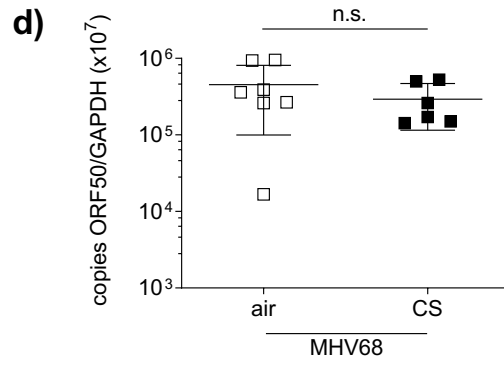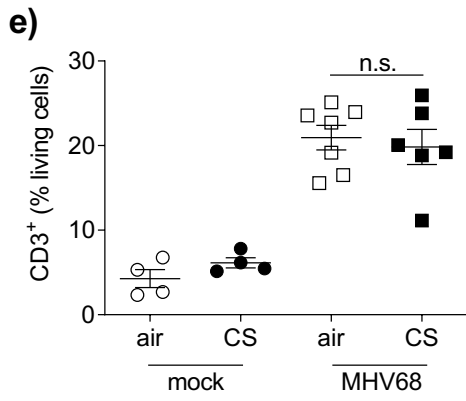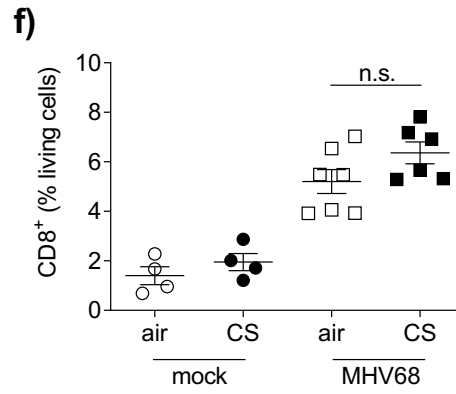

Supplementary Figure S2

a)

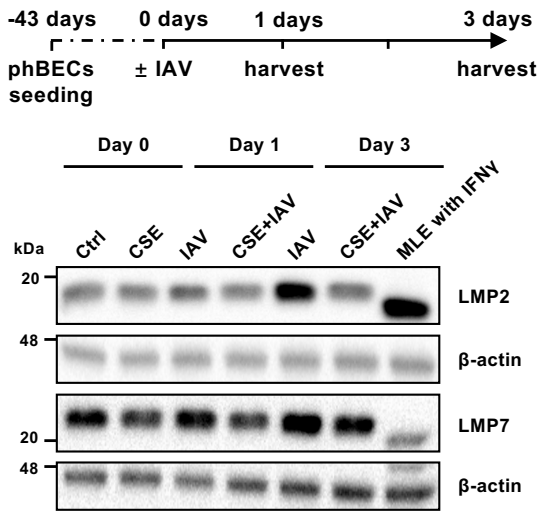

b)

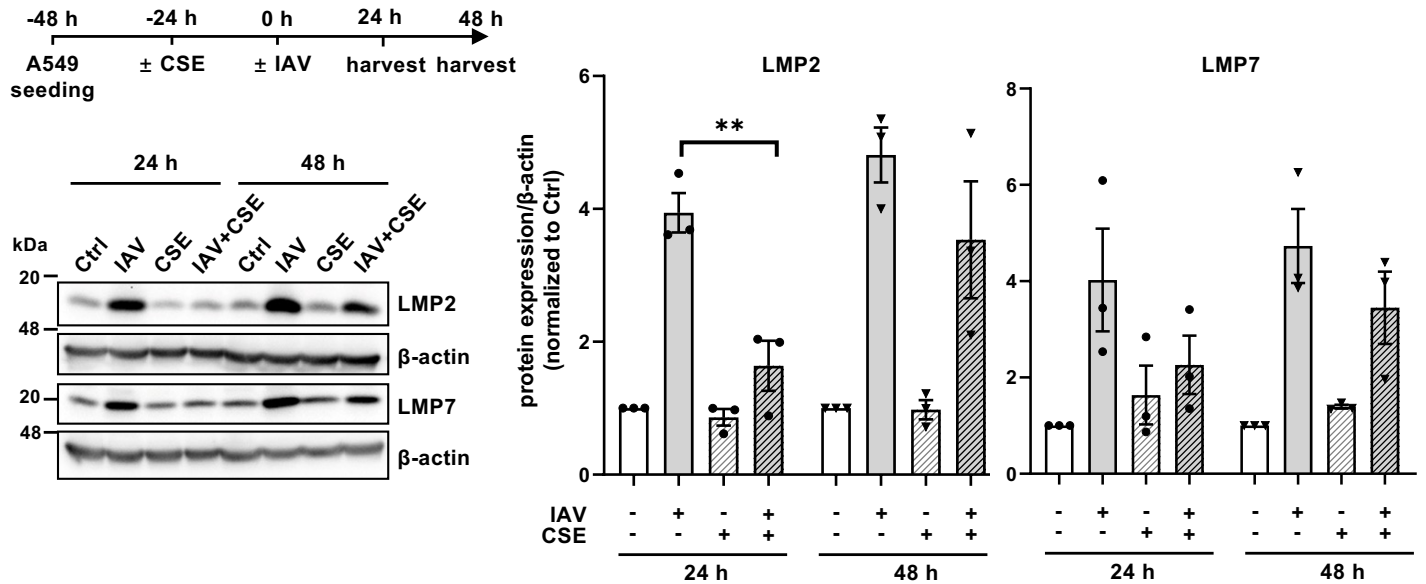

c)

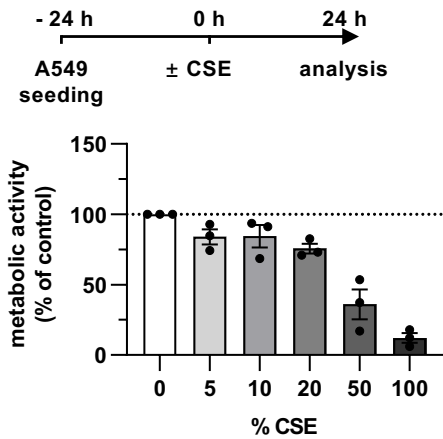

Supplementary Figure S3

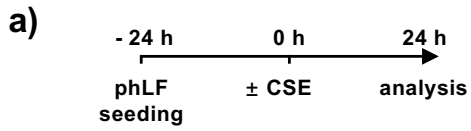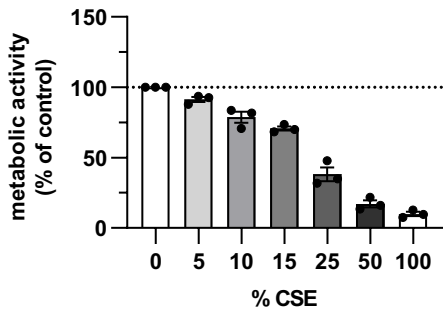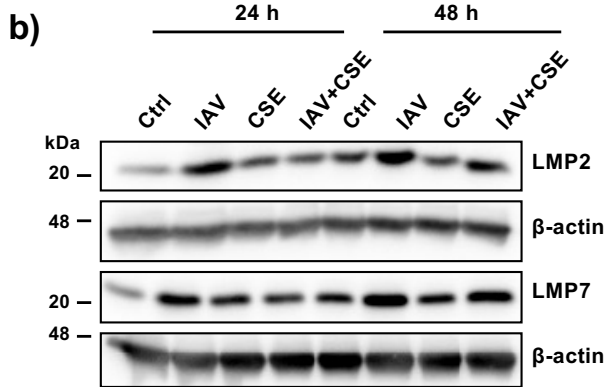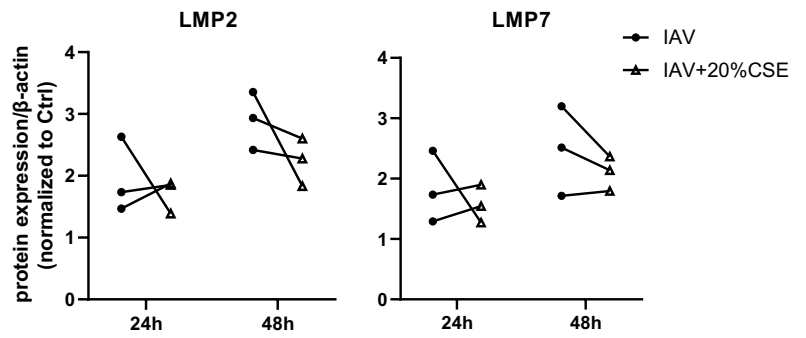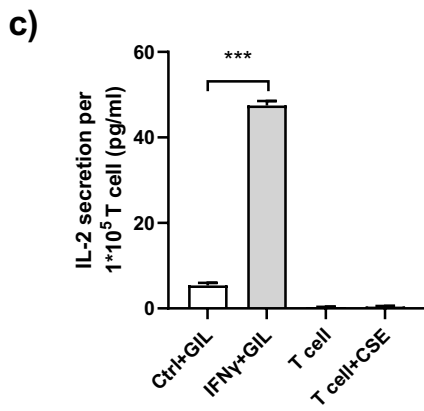

Supplementary Figure S4

a)

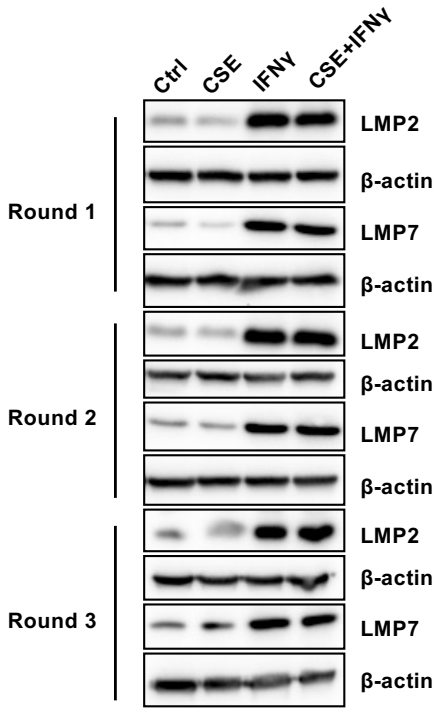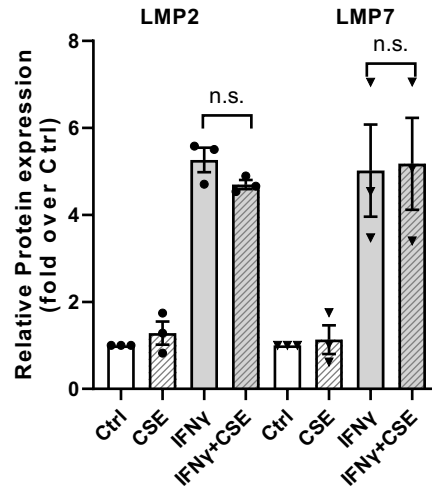

b)

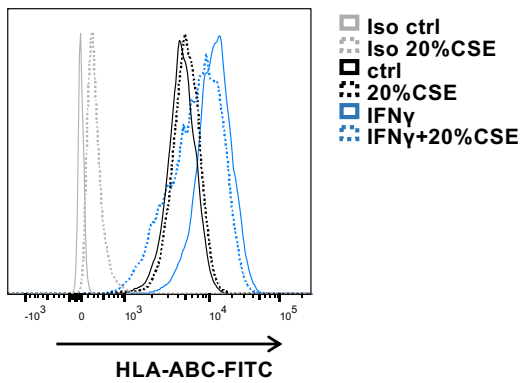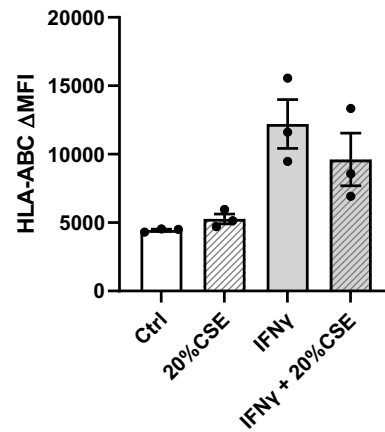

Supplementary Figure S5

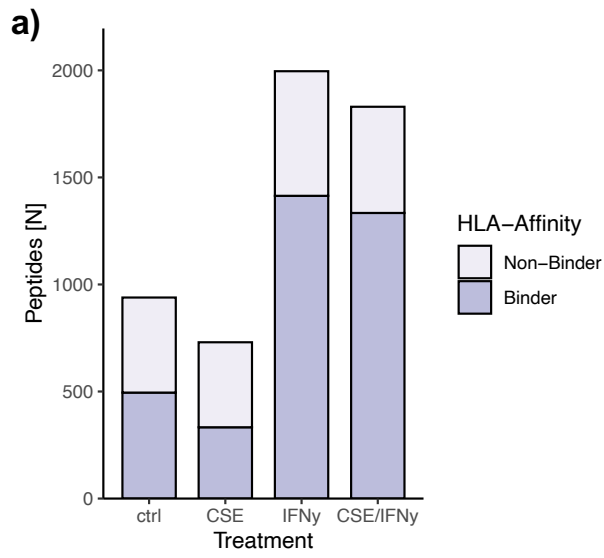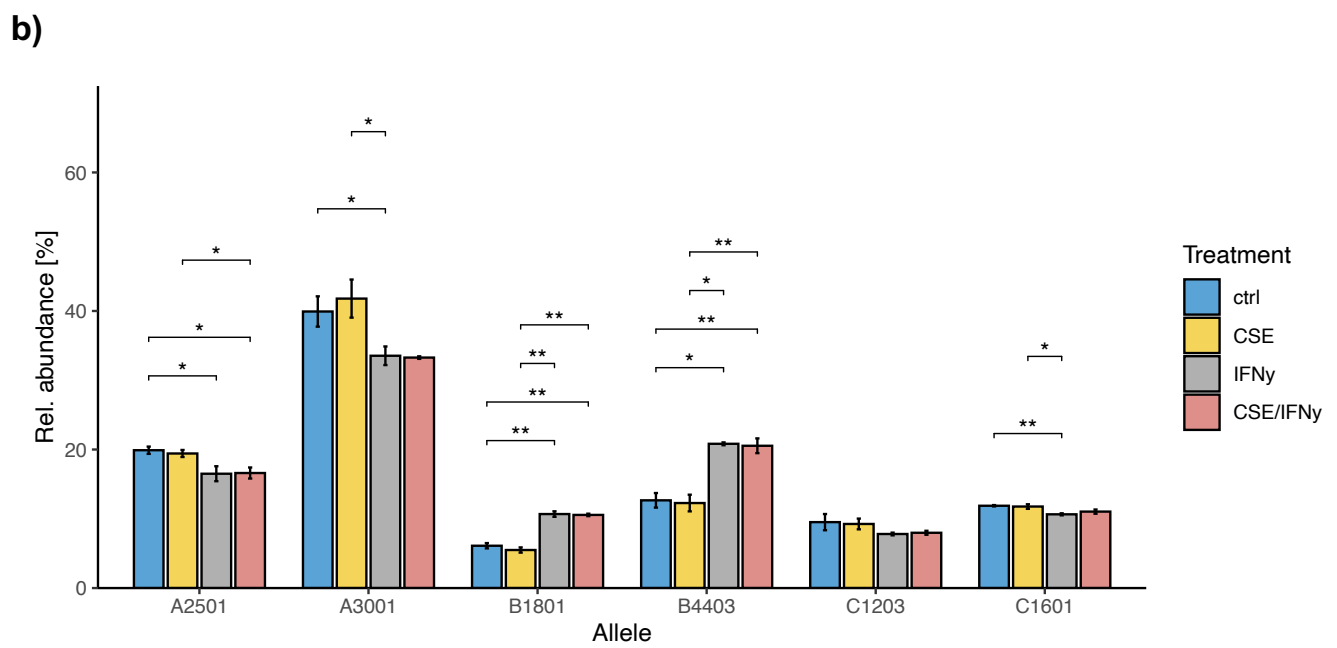

**Supplementary Figure S6**

c)

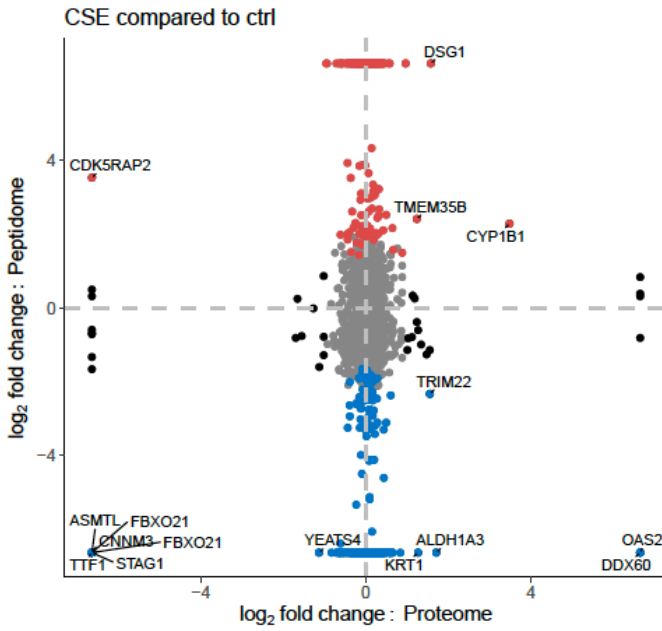

| n                | Proteome |      |    |
|------------------|----------|------|----|
|                  | -        | =    | +  |
| Immuno-peptidome | +        | 234  | 6  |
|                  | -        | 1314 | 18 |
|                  | +        | 8    | 18 |
|                  | -        | 418  | 5  |

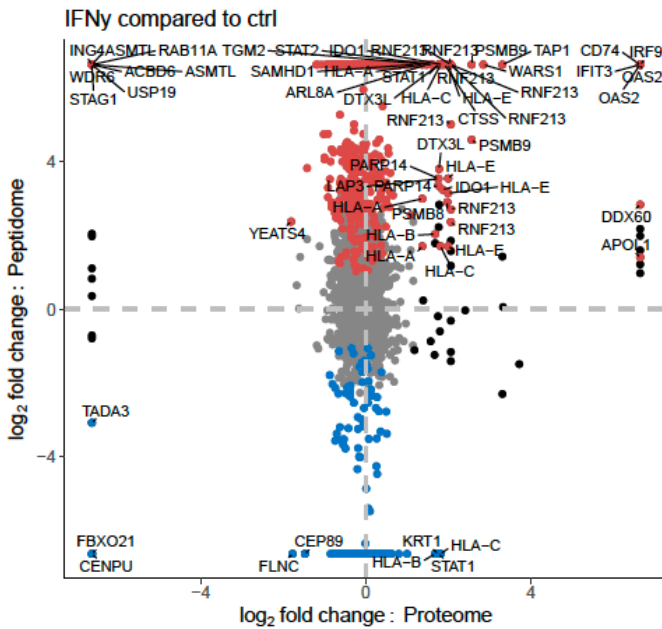

| n                | Proteome |      |    |
|------------------|----------|------|----|
|                  | -        | =    | +  |
| Immuno-peptidome | +        | 696  | 43 |
|                  | -        | 1203 | 25 |
|                  | +        | 9    | 43 |
|                  | -        | 199  | 4  |

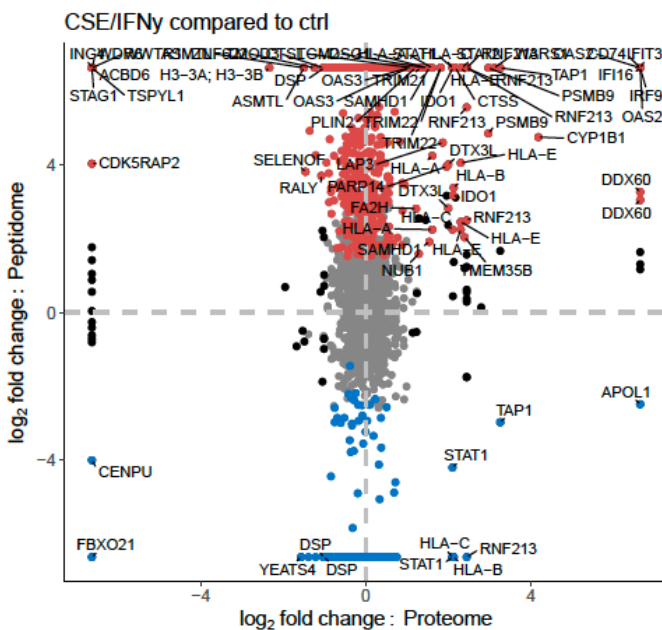

| n                | Proteome |      |    |
|------------------|----------|------|----|
|                  | -        | =    | +  |
| Immuno-peptidome | +        | 671  | 52 |
|                  | -        | 1191 | 24 |
|                  | +        | 17   | 52 |
|                  | -        | 195  | 7  |

Supplementary Figure S6



**a) HLA-A2<sup>+</sup> subject stained with IAV-tetramer**

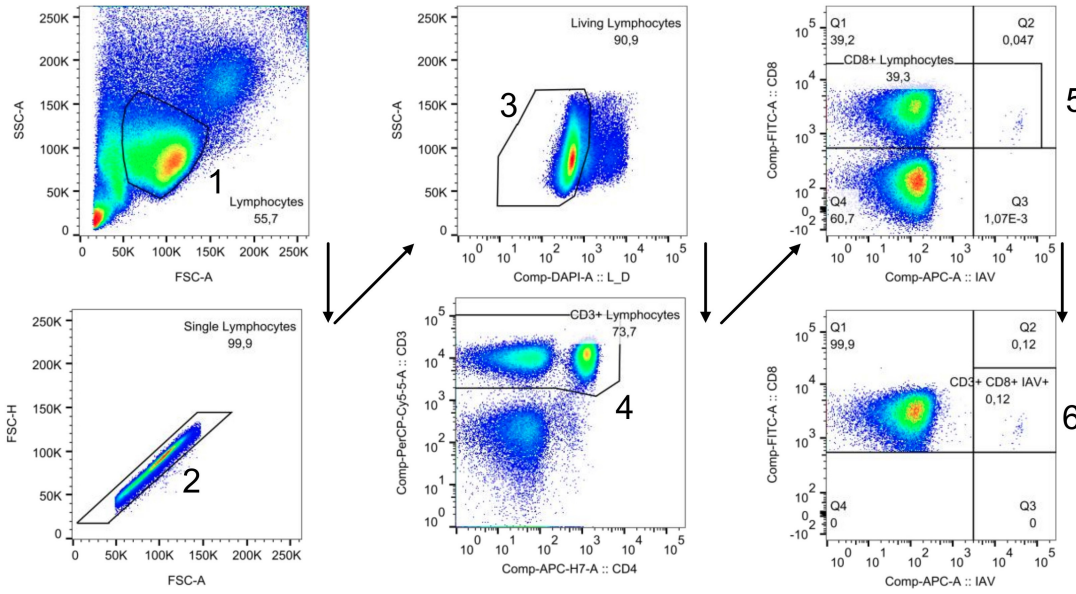

**Gating strategy**

- 1) lymphocyte gate
- 2) exclusion of doublets
- 3) exclusion of dead cells
- 4) CD3+ cells
- 5) CD8+ IAV-tetramer+ cells of all CD3 cells
- 6) CD8+ IAV-tetramer+ cells of all CD8+ cells

**b) HLA-A2<sup>+</sup> subject no tetramer staining**

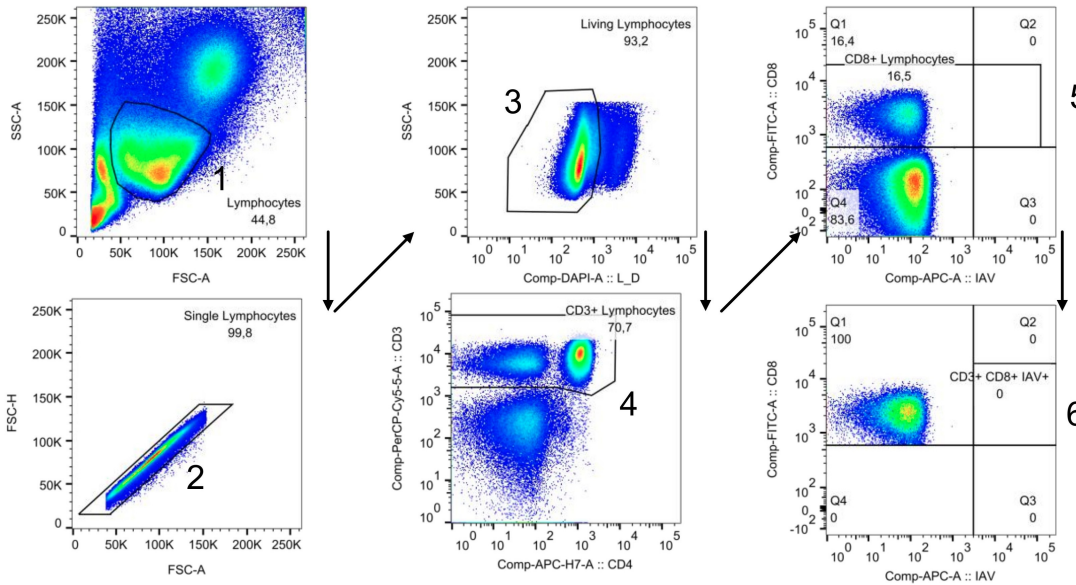

**c) HLA-A2<sup>-</sup> subject stained with IAV-tetramer**

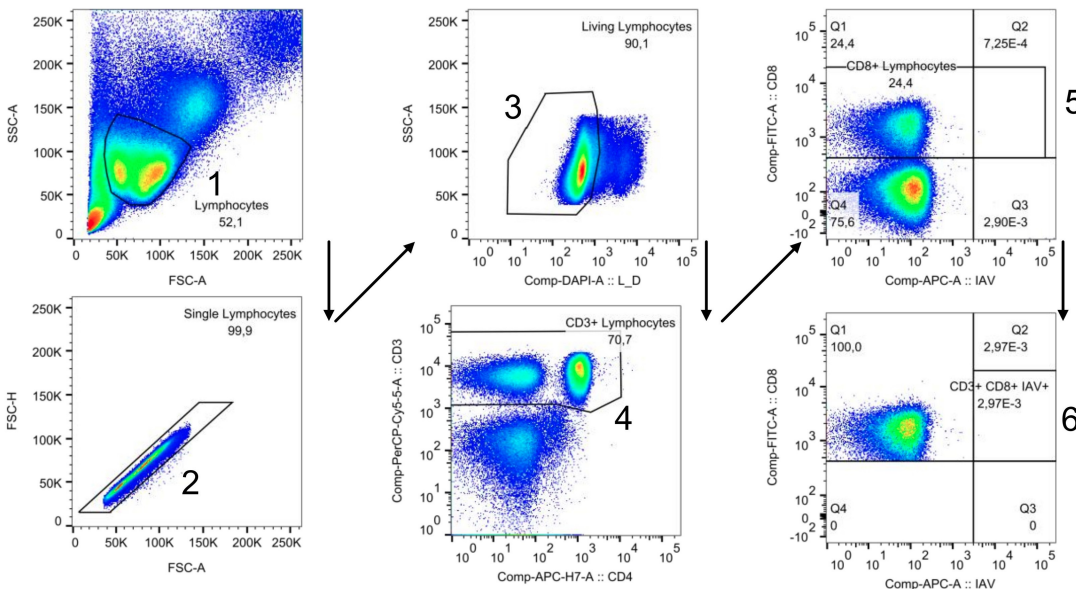

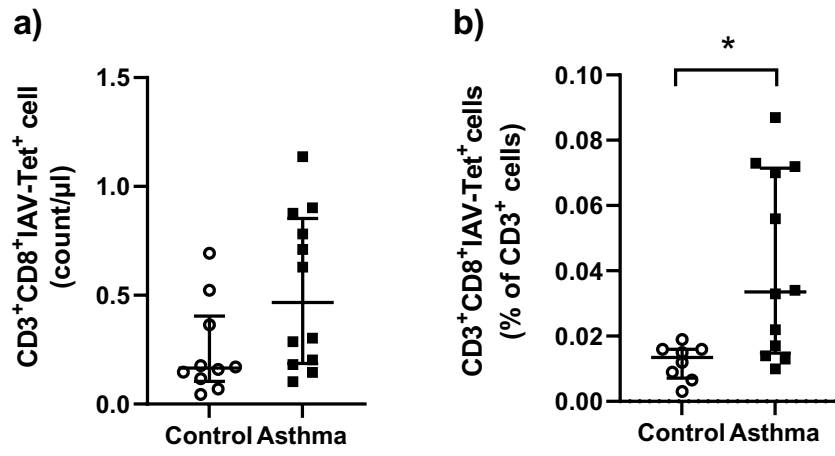

Supplementary Figure S8
