# Supplementary material for: Antiviral CD8+ T-cell immune responses are impaired by cigarette smoke and in COPD
Source: PubMed Central journal article supplement — Eur Respir J. 2023 Aug 3;62(2):2201374. doi: 10.1183/13993003.01374-2022 (PMC10397470; doi:10.1183/13993003.01374-2022), 2023-08-03
Supplement: ERJ-01374-2022.Shareable.pdf [file ERJ-01374-2022.Shareable.pdf]

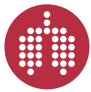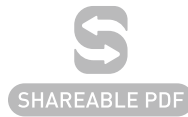

# Antiviral CD8<sup>+</sup> T-cell immune responses are impaired by cigarette smoke and in COPD

Jie Chen, Xinyuan Wang, Adrian Schmalen , Sophia Haines, Martin Wolff, Huan Ma, Huabin Zhang, Mircea Gabriel Stoleriu, Johannes Nowak, Misako Nakayama, Marta Bueno, Judith Brands, Ana L. Mora, Janet S. Lee, Susanne Krauss-Etschmann , Anna Dmitrieva, Marion Frankenberger, Thomas P. Hofer , Elfriede Noessner, Andreas Moosmann, Jürgen Behr, Katrin Milger , Cornelia A. Deeg, Claudia A. Staab-Weijnitz, Stefanie M. Hauck, Heiko Adler, Torsten Goldmann , Karoline I. Gaede, Jochen Behrends , Ilona E. Kammerl and Silke Meiners

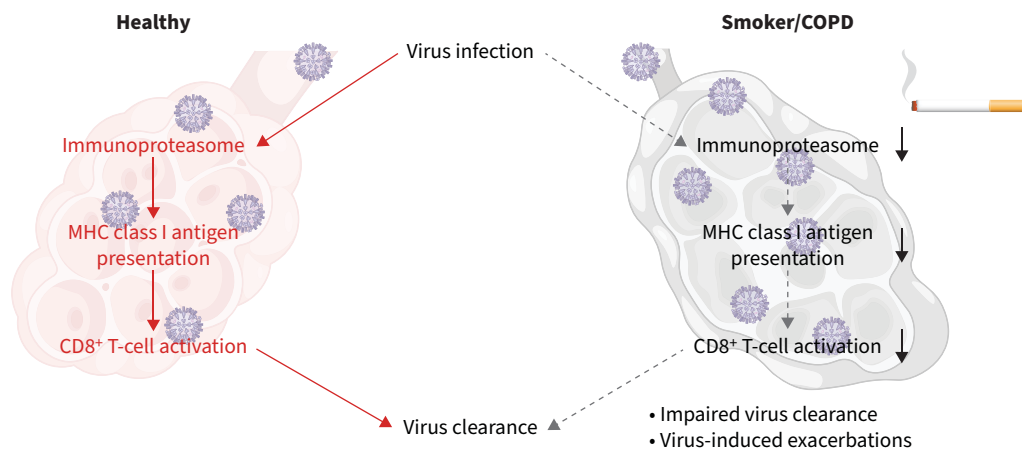

**GRAPHICAL ABSTRACT** Main findings of the study. Cigarette smoke impairs virus-induced upregulation of the major histocompatibility complex (MHC) class I antigen presentation machinery resulting in reduced activation of antiviral CD8<sup>+</sup> T-cells.

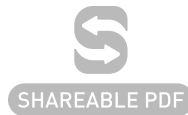

# Antiviral CD8<sup>+</sup> T-cell immune responses are impaired by cigarette smoke and in COPD

Jie Chen<sup>1,2,3,24</sup>, Xinyuan Wang<sup>1,4,24</sup>, Adrian Schmalen<sup>5,6</sup>, Sophia Haines<sup>1</sup>, Martin Wolff<sup>7</sup>, Huan Ma<sup>7</sup>, Huabin Zhang<sup>8</sup>, Mircea Gabriel Stoleriu<sup>1,9,10</sup>, Johannes Nowak<sup>1</sup>, Misako Nakayama<sup>1</sup>, Marta Bueno<sup>11</sup>, Judith Brands<sup>11</sup>, Ana L. Mora<sup>11,12</sup>, Janet S. Lee<sup>13</sup>, Susanne Krauss-Etschmann<sup>7</sup>, Anna Dmitrieva<sup>14,15</sup>, Marion Frankenberger<sup>1</sup>, Thomas P. Hofer<sup>16</sup>, Elfriede Noessner<sup>16</sup>, Andreas Moosmann<sup>17,18</sup>, Jürgen Behr<sup>19</sup>, Katrin Milger<sup>19</sup>, Cornelia A. Deeg<sup>5</sup>, Claudia A. Staab-Weijnitz<sup>1</sup>, Stefanie M. Hauck<sup>6</sup>, Heiko Adler<sup>14,15</sup>, Torsten Goldmann<sup>20</sup>, Karoline I. Gaede<sup>21</sup>, Jochen Behrends<sup>22</sup>, Ilona E. Kammerl<sup>1,24</sup> and Silke Meiners<sup>1,7,23,24</sup>

<sup>1</sup>Institute of Lung Health and Immunity and Comprehensive Pneumology Center with the CPC-M bioArchive, Helmholtz Zentrum München, Member of the German Center for Lung Research (DZL), Munich, Germany. <sup>2</sup>Department of Respiratory Medicine, National Key Clinical Specialty, Branch of National Clinical Research Center for Respiratory Disease, Xiangya Hospital, Central South University, Changsha, China. <sup>3</sup>College of Pulmonary and Critical Care Medicine, Chinese PLA General Hospital, Beijing, China. <sup>4</sup>Guangzhou Medical University, Guangzhou, China. <sup>5</sup>Department of Veterinary Sciences, LMU Munich, Martinsried, Germany. <sup>6</sup>Metabolomics and Proteomics Core, Helmholtz Center Munich, Munich, Germany. <sup>7</sup>Institute of Experimental Medicine, Christian-Albrechts University Kiel, Kiel, Germany. <sup>8</sup>Neurosurgery Department, The Second Affiliated Hospital of Guangzhou Medical University, Guangzhou, China. <sup>9</sup>Division of Thoracic Surgery Munich, University Clinic of Ludwig-Maximilians-University of Munich (LMU), Munich, Germany. <sup>10</sup>Asklepios Pulmonary Hospital, Gauting, Germany. <sup>11</sup>Division of Pulmonary and Critical Care Medicine, School of Medicine, University of Pittsburgh, Pittsburgh, PA, USA. <sup>12</sup>Division of Pulmonary, Critical Care and Sleep Medicine, Department of Internal Medicine, Davis Heart Lung Institute, Ohio State University, Columbus, OH, USA. <sup>13</sup>Division of Pulmonary and Critical Care Medicine, Washington University in St. Louis, St. Louis, MO, USA. <sup>14</sup>Institute of Asthma and Allergy Prevention, Helmholtz Center Munich, Member of the German Center of Lung Research (DZL), Munich, Germany. <sup>15</sup>Walther Straub Institute of Pharmacology and Toxicology, Ludwig-Maximilians-University Munich, Member of the German Center of Lung Research (DZL), Munich, Germany. <sup>16</sup>Immunoanalytics – Working Group Tissue Control of Immunocytes, Helmholtz Center Munich, Munich, Germany. <sup>17</sup>DZIF Group Host Control of Viral Latency and Reactivation, Department of Medicine III, LMU-Klinikum, Munich, Germany. <sup>18</sup>DZIF – German Center for Infection Research, Munich, Germany. <sup>19</sup>Department of Medicine V, University Hospital, LMU Munich, Comprehensive Pneumology Center, Member of the German Center for Lung Research (DZL), Munich, Germany. <sup>20</sup>Histology, Research Center Borstel, Leibniz Lung Center, Airway Research Center North (ARCEN), Member of the German Center for Lung Research (DZL), Borstel, Germany. <sup>21</sup>BioMaterialBank North, Research Center Borstel, Leibniz Lung Center, Airway Research Center North (ARCEN), Member of the German Center for Lung Research (DZL), Poppen 2.0 Network, (P2N), Borstel, Germany. <sup>22</sup>Core Facility Fluorescence Cytometry, Research Center Borstel, Leibniz Lung Center, Borstel, Germany. <sup>23</sup>Research Center Borstel, Leibniz Lung Center, Airway Research Center North (ARCEN), Member of the German Center for Lung Research (DZL), Borstel, Germany. <sup>24</sup>These authors contributed equally.

Corresponding author: Silke Meiners ([smeiners@fz-borstel.de](mailto:smeiners@fz-borstel.de))

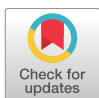

Shareable abstract (@ERSpublications)

Cigarette smoke impairs virus-induced upregulation of the MHC class I antigen presentation machinery resulting in reduced activation of antiviral CD8<sup>+</sup> T-cells. This may reduce viral clearance and increase susceptibility to viral exacerbations in COPD. <https://bit.ly/43o0p3D>

**Cite this article as:** Chen J, Wang X, Schmalen A, *et al.* Antiviral CD8<sup>+</sup> T-cell immune responses are impaired by cigarette smoke and in COPD. *Eur Respir J* 2023; 62: 2201374 [DOI: 10.1183/13993003.01374-2022].

This extracted version can be shared freely online.

## Abstract

**Background** Virus infections drive COPD exacerbations and progression. Antiviral immunity centres on the activation of virus-specific CD8<sup>+</sup> T-cells by viral epitopes presented on major histocompatibility complex (MHC) class I molecules of infected cells. These epitopes are generated by the immunoproteasome, a specialised intracellular protein degradation machine, which is induced by antiviral cytokines in infected cells.

**Methods** We analysed the effects of cigarette smoke on cytokine- and virus-mediated induction of the immunoproteasome *in vitro*, *ex vivo* and *in vivo* using RNA and Western blot analyses. CD8<sup>+</sup> T-cell

Copyright ©The authors 2023.

This version is distributed under the terms of the Creative Commons Attribution Non-Commercial Licence 4.0. For commercial reproduction rights

and permissions contact  
permissions@ersnet.org

This article has an editorial  
commentary:

[https://doi.org/10.1183/  
13993003.01030-2023](https://doi.org/10.1183/13993003.01030-2023)

Received: 15 July 2022

Accepted: 24 May 2023

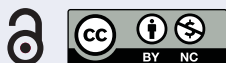

activation was determined in co-culture assays with cigarette smoke-exposed influenza A virus (IAV)-infected cells. Mass-spectrometry-based analysis of MHC class I-bound peptides uncovered the effects of cigarette smoke on inflammatory antigen presentation in lung cells. IAV-specific CD8<sup>+</sup> T-cell numbers were determined in patients' peripheral blood using tetramer technology.

**Results** Cigarette smoke impaired the induction of the immunoproteasome by cytokine signalling and viral infection in lung cells *in vitro*, *ex vivo* and *in vivo*. In addition, cigarette smoke altered the peptide repertoire of antigens presented on MHC class I molecules under inflammatory conditions. Importantly, MHC class I-mediated activation of IAV-specific CD8<sup>+</sup> T-cells was dampened by cigarette smoke. COPD patients exhibited reduced numbers of circulating IAV-specific CD8<sup>+</sup> T-cells compared to healthy controls and asthmatics.

**Conclusion** Our data indicate that cigarette smoke interferes with MHC class I antigen generation and presentation and thereby contributes to impaired activation of CD8<sup>+</sup> T-cells upon virus infection. This adds important mechanistic insight on how cigarette smoke mediates increased susceptibility of smokers and COPD patients to viral infections.
